# Supplementary material for: High-rate amorphous SnO2 nanomembrane anodes for Li-ion batteries with a long cycling life
Source: Royal Society of Chemistry journal article supplement (doi:10.1039/c4nr04903a), 2014-11-03
Supplement: c4nr04903a1.pdf [file c4nr04903a1.pdf]

## Supplementary Information

### High-rate amorphous SnO<sub>2</sub> nanomembrane anodes for Li-ion batteries with long cycling life

*Xianghong Liu,\*<sup>a</sup> Jun Zhang,<sup>d</sup> Wenping Si,<sup>a, b</sup> Lixia Xi,<sup>e</sup> Steffen Oswald,<sup>e</sup> Chenglin Yan,\*<sup>a, c</sup> and Oliver G. Schmidt<sup>a, b</sup>*

<sup>a</sup>Institute for Integrative Nanosciences, IFW-Dresden, Helmholtzstrasse 20, 01069 Dresden, Germany. Email: [xianghong.liu@ifw-dresden.de](mailto:xianghong.liu@ifw-dresden.de) (X. Liu). Fax: +49 351 4659 782.

<sup>b</sup>Material Systems for Nanoelectronics, Chemnitz University of Technology, Reichenhainerstrasse 70, 09107 Chemnitz, Germany.

<sup>c</sup>School of Energy, Soochow University, 215006 Suzhou, Jiangsu, China. Email: [c.yan@suda.edu.cn](mailto:c.yan@suda.edu.cn) (C. Yan)

<sup>d</sup>School of Materials Science and Engineering, University of Jinan, Jinan 250022, China.

<sup>e</sup>Institute for Complex Materials, IFW-Dresden, Helmholtzstrasse 20, 01069 Dresden, Germany.

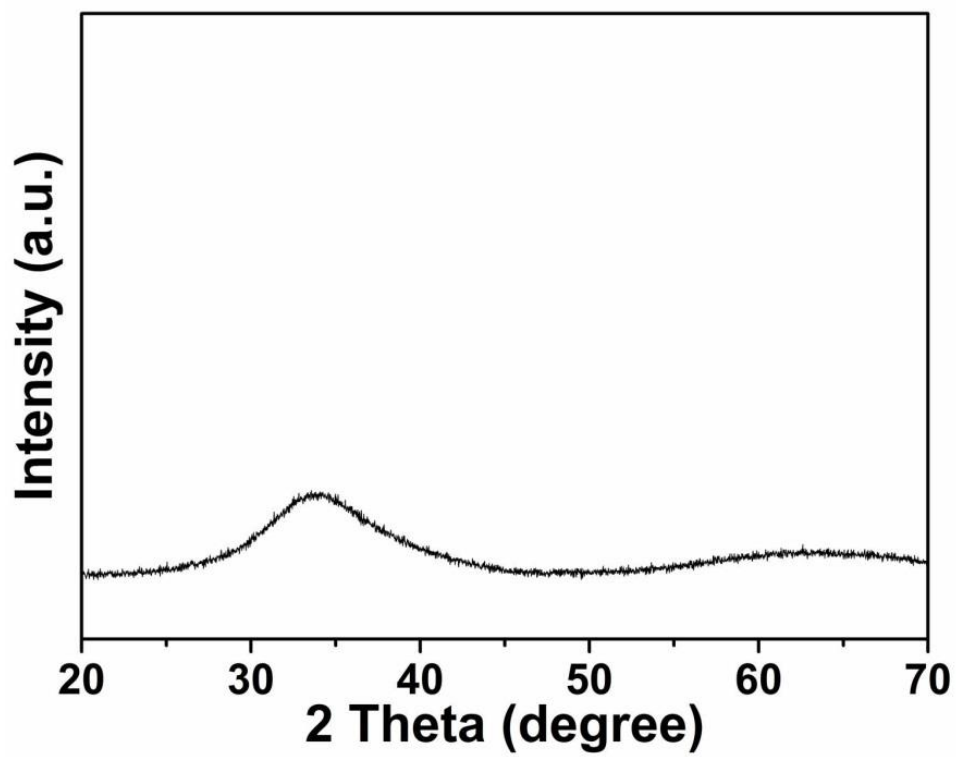

Fig. S1 XRD pattern of the as-prepared SnO<sub>2</sub> rolled-up nanomembranes.

**Table S1** Electrochemical performance comparison of various SnO<sub>2</sub>-based anodes.

| SnO <sub>2</sub> -based Anodes                                    | Current density/Capacity/Cycle life                               | Maximum rate                                                   | Voltage window | Ref.         |
|-------------------------------------------------------------------|-------------------------------------------------------------------|----------------------------------------------------------------|----------------|--------------|
| ultra-small SnO <sub>2</sub> nanocrystals                         | 392 mA g <sup>-1</sup> /910 mAh g <sup>-1</sup> /100 cycles       | 8C (6.27 A g <sup>-1</sup> )                                   | 0.01–2.0 V     | 1            |
| SnO <sub>2</sub> nanowires                                        | 100 mA g <sup>-1</sup> /~300 mAh g <sup>-1</sup> /50 cycles       |                                                                | 0.05–1.5 V     | 2            |
| Sn/SnO <sub>2</sub> nanowires                                     | 100 mA g <sup>-1</sup> /814 mAh g <sup>-1</sup> /100 cycles       |                                                                | 0–2.2V         | 3            |
| SnO <sub>2</sub> nanorods on graphene                             | 200 mA g <sup>-1</sup> /576 mAh g <sup>-1</sup> /50 cycles        |                                                                | 0.005–3 V      | 4            |
| SnO <sub>2</sub> nanotubes                                        | 100 mA g <sup>-1</sup> /468 mAh g <sup>-1</sup> /30 cycles        |                                                                | 0.005–1.5 V    | 5            |
| SnO <sub>2</sub> nanosheets                                       | 78.2 mA g <sup>-1</sup> /559 mAh g <sup>-1</sup> /20 cycles       |                                                                | 0.005–3 V      | 6            |
| SnO <sub>2</sub> nanoboxes                                        | 0.2C/570 mAh g <sup>-1</sup> /40 cycles                           |                                                                | 0.01–2.0 V     | 7            |
| double-shelled SnO <sub>2</sub> yolk–shell nanospheres            | 625 mA g <sup>-1</sup> /642 mAh g <sup>-1</sup> /40 cycles        |                                                                | 0.005–1 V      | 8            |
| SnO <sub>2</sub> hollow spheres                                   | 160 mA g <sup>-1</sup> /~700 mAh g <sup>-1</sup> /20cycles        |                                                                | 0.01–2.0 V     | 9            |
| porous SnO <sub>2</sub> nanotubes                                 | 180 mA g <sup>-1</sup> /807mAh g <sup>-1</sup> /50 cycles (0–2 V) | 1.88 A g <sup>-1</sup> (0-2V)<br>7.82 A g <sup>-1</sup> (0-3V) |                | 10           |
| ultra-small SnO <sub>2</sub> particles in micro/mesoporous carbon | 1.4 A g <sup>-1</sup> /443 mA h g <sup>-1</sup> /2000 cycles      | 10C (14 A g <sup>-1</sup> )                                    | 0.01–1.5 V     | 11           |
| 3 nm SnO <sub>2</sub> nanoparticles/graphene                      | 2 A g <sup>-1</sup> /1813 mA h g <sup>-1</sup> /1000 cycles       | 10 A g <sup>-1</sup>                                           | 0.005–3 V      | 12           |
| ultrasnall SnO <sub>2</sub> nanoparticles in carbon               | 800 mA g <sup>-1</sup> /712.8 mAh g <sup>-1</sup> /378 cycles     | 3 A g <sup>-1</sup>                                            | 0.01–3.0 V     | 13           |
| sandwiched graphene/SnO <sub>2</sub> nanorods/carbon              | 1000 mA g <sup>-1</sup> /~800 mAh g <sup>-1</sup> /350 cycles     | 3 A g <sup>-1</sup>                                            | 0.01–3 V       | 14           |
| SnO <sub>2</sub> nanomembranes                                    | 1.6 A g <sup>-1</sup> /854 mAh g <sup>-1</sup> /1000 cycles       | 40 A g <sup>-1</sup>                                           | 0.01–3 V       | Current work |

## References

1. L. Ding, S. He, S. Miao, M. R. Jorgensen, S. Leubner, C. Yan, S. G. Hickey, A. Eychmüller, J. Xu and O. G. Schmidt, *Sci. Rep.*, 2014, **4**, 4647.
2. M. S. Park, G. X. Wang, Y. M. Kang, D. Wexler, S. X. Dou and H. K. Liu, *Angew. Chem., Int. Ed.*, 2007, **46**, 750-753.
3. P. Meduri, C. Pendyala, V. Kumar, G. U. Sumanasekera and M. K. Sunkara, *Nano Lett.*, 2009, **9**, 612-616.
4. C. Xu, J. Sun and L. Gao, *J. Mater. Chem.*, 2012, **22**, 975-979.
5. J. Ye, H. Zhang, R. Yang, X. Li and L. Qi, *Small*, 2010, **6**, 296-306.
6. C. Wang, Y. Zhou, M. Y. Ge, X. B. Xu, Z. L. Zhang and J. Z. Jiang, *J. Am. Chem. Soc.*, 2010, **132**, 46-47.
7. Z. Y. Wang, D. Y. Luan, F. Y. C. Boey and X. W. Lou, *J. Am. Chem. Soc.*, 2011, **133**, 4738-4741.
8. Y. J. Hong, M. Y. Son and Y. C. Kang, *Adv. Mater.*, 2013, **25**, 2279-2283.
9. S. Ding, J. S. Chen, G. Qi, X. Duan, Z. Wang, E. P. Giannelis, L. A. Archer and X. W. Lou, *J. Am. Chem. Soc.*, 2010, **133**, 21-23.
10. L. Li, X. Yin, S. Liu, Y. Wang, L. Chen and T. Wang, *Electrochem. Commun.*, 2010, **12**, 1383-1386.
11. A. Jahel, C. M. Ghimbeu, L. Monconduit and C. Vix-Guterl, *Adv. Energy Mater.*, 2014, **4**, DOI: 10.1002/aenm.201400025.
12. Y. Chen, B. Song, R. M. Chen, L. Lu and J. Xue, *J. Mater. Chem. A*, 2014, **2**, 5688-5695.
13. Q. Tian, Y. Tian, Z. Zhang, L. Yang and S.-i. Hirano, *J. Power Sources*, 2014, **269**, 479-485.
14. D. Wang, J. Yang, X. Li, D. Geng, R. Li, M. Cai, T.-K. Sham and X. Sun, *Energy Environ. Sci.*, 2013, **6**, 2900-2906.
